# Supplementary material for: Synergy Testing of FDA-Approved Drugs Identifies Potent Drug Combinations against Trypanosoma cruzi
Source: PLoS Negl Trop Dis. 2014 Jul 17;8(7):e2977. doi: 10.1371/journal.pntd.0002977 (PMC4102417; doi:10.1371/journal.pntd.0002977)
Supplement: Table S2 — 151 hit compounds (see Figure 1 ) organized by class/mechanism. (XLSX) [file pntd.0002977.s007.xlsx]

## Sheet: Table S2
Table S2. 151 hit compounds (see Fig. 1) organized by class/mechanism
Class/Mechanism COMPOUND NAME	SMILES	IUPAC	T. cruzi % growth @ 10 uM (Amastigotes)	T. cruzi % growth @ 10 uM: SD	Mammalian (3T3) cell % growth at 10 uM	Mammalian (3T3) cell growth at 10 uM: SD	T. cruzi EC50 (nM)
Antihistamine
CLOPERASTINE	Clc1ccc(cc1)C(OCCN1CCCCC1)c1ccccc1	1-{2-[(4-chlorophenyl)(phenyl)methoxy]ethyl}piperidine	1.2	0.3	100	2.3	5600; 5800
AZELASTINE HYDROCHLORIDE	Cl.CN1CCCC(CC1)N1N=C(Cc2ccc(Cl)cc2)c2ccccc2C1=O	4-[(4-chlorophenyl)methyl]-2-(1-methylazepan-4-yl)-1,2-dihydrophthalazin-1-one hydrochloride	1.5	0.2	95.1	4.4	2200
PIMETHIXENE	CN1CCC(CC1)=C1c2ccccc2Sc2ccccc12	1-methyl-4-(9H-thioxanthen-9-ylidene)piperidine	3.9	0.6	98.5	0.8
ASTEMIZOLE	COc1ccc(CCN2CCC(CC2)Nc2nc3ccccc3n2Cc2ccc(F)cc2)cc1	1-[(4-fluorophenyl)methyl]-N-{1-[2-(4-methoxyphenyl)ethyl]piperidin-4-yl}-1H-1,3-benzodiazol-2-amine	11.6	7.1	100	4.8	880
CLEMASTINE	CN1CCCC1CCOC(C)(c1ccccc1)c1ccc(Cl)cc1	2-{2-[1-(4-chlorophenyl)-1-phenylethoxy]ethyl}-1-methylpyrrolidine	12.9	1.29	93.2	1	370; 440
Phenothiazine and related - antipsychotic
TRIFLUPROMAZINE HYDROCHLORIDE	Cl.CN(C)CCCN1c2ccccc2Sc2ccc(cc12)C(F)(F)F	dimethyl({3-[2-(trifluoromethyl)-10H-phenothiazin-10-yl]propyl})amine hydrochloride	1.4	1.1	80.2	0.6
CHLORPROTHIXENE	CN(C)CC\C=C1\c2ccccc2Sc2ccc(Cl)cc12	{3-[(9Z)-2-chloro-9H-thioxanthen-9-ylidene]propyl}dimethylamine	1.8	0.5	97.1	3	2600; 2350
FLUPHENAZINE	OCCN1CCN(CCCN2c3ccccc3Sc3ccc(cc23)C(F)(F)F)CC1	2-(4-{3-[2-(trifluoromethyl)-10H-phenothiazin-10-yl]propyl}piperazin-1-yl)ethan-1-ol	2.2	0.9	100	1.7
METHIOTHEPIN	OC(=O)\C=C/C(O)=O.CSc1ccc2Sc3ccccc3CC(N3CCN(C)CC3)c2c1	(2Z)-but-2-enedioic acid; 1-methyl-4-[6-(methylsulfanyl)-2-thiatricyclo[9.4.0.0^{3,8}]pentadeca-1(15),3,5,7,11,13-hexaen-9-yl]piperazine	4.4	0.2	69.6	2.4
PROMAZINE	Cl.CN(C)CCCN1c2ccccc2Sc2ccccc12	dimethyl[3-(10H-phenothiazin-10-yl)propyl]amine hydrochloride	9.2	1.51	98.7	0.2
CHLORPROMAZINE	CN(C)CCCN1c2ccccc2Sc2ccc(Cl)cc12	[3-(2-chloro-10H-phenothiazin-10-yl)propyl]dimethylamine	14.2	3.24	99.3	8.9
THIORIDAZINE	CSc1ccc2Sc3ccccc3N(CCC3CCCCN3C)c2c1	10-[2-(1-methylpiperidin-2-yl)ethyl]-2-(methylsulfanyl)-10H-phenothiazine	19.1	5.76	45.7	5.5	2600
TRIFLUOPERAZINE	CN1CCN(CCCN2c3ccccc3Sc3ccc(cc23)C(F)(F)F)CC1	10-[3-(4-methylpiperazin-1-yl)propyl]-2-(trifluoromethyl)-10H-phenothiazine	20.4	4.56	94.7	1.1
SSRI - antidepressant
SERTRALINE HYDROCHLORIDE	Cl.CNC1CCC(c2ccc(Cl)c(Cl)c2)c2ccccc12	4-(3,4-dichlorophenyl)-N-methyl-1,2,3,4-tetrahydronaphthalen-1-amine hydrochloride	1.1	0	100	6.4	1500; 1900
FLUOXETINE	Cl.CNCCC(Oc1ccc(cc1)C(F)(F)F)c1ccccc1	methyl({3-phenyl-3-[4-(trifluoromethyl)phenoxy]propyl})amine hydrochloride	2	0.7	100	0.1	3200; 5500
PAROXETINE HYDROCHLORIDE	Cl.Fc1ccc(cc1)C1CCNCC1COc1ccc2OCOc2c1	3-[(2H-1,3-benzodioxol-5-yloxy)methyl]-4-(4-fluorophenyl)piperidine hydrochloride	6.8	0.8	100	9.1	3300; 5600
Tricyclic antidepressant
CLOMIPRAMINE	Cl.CN(C)CCCN1c2ccccc2CCc2ccc(Cl)cc12	(3-{5-chloro-2-azatricyclo[9.4.0.0^{3,8}]pentadeca-1(15),3,5,7,11,13-hexaen-2-yl}propyl)dimethylamine hydrochloride	8	2.5	84.6	6.1
NORTRIPTYLINE	CNCCC=C1c2ccccc2CCc2ccccc12	methyl(3-{tricyclo[9.4.0.0^{3,8}]pentadeca-1(15),3,5,7,11,13-hexaen-2-ylidene}propyl)amine	9.7	1.61	100	11.1	5180
AMOXAPINE	Clc1ccc2Oc3ccccc3N=C(N3CCNCC3)c2c1	13-chloro-10-(piperazin-1-yl)-2-oxa-9-azatricyclo[9.4.0.0^{3,8}]pentadeca-1(15),3,5,7,9,11,13-heptaene	11.7	3.3	98	7	9350
AMITRIPTYLINE	CN(C)CCC=C1c2ccccc2CCc2ccccc12	dimethyl(3-{tricyclo[9.4.0.0^{3,8}]pentadeca-1(15),3,5,7,11,13-hexaen-2-ylidene}propyl)amine	15.7	1.58	100	7.8	6600; 3560
Misc. centrally acting agents
SPIPERONE	Fc1ccc(cc1)C(=O)CCCN1CCC2(CC1)N(CNC2=O)c1ccccc1	8-[4-(4-fluorophenyl)-4-oxobutyl]-1-phenyl-1,3,8-triazaspiro[4.5]decan-4-one	17.1	5.4	94.7	2.6	7900
PIZOTYLINE MALATE	OC(CC(O)=O)C(O)=O.CN1CCC(CC1)=C1c2ccsc2CCc2ccccc12	1-methyl-4-{6-thiatricyclo[8.4.0.0^{3,7}]tetradeca-1(14),3(7),4,10,12-pentaen-2-ylidene}piperidine; 2-hydroxybutanedioic acid	21.4	2.5	86.5	8.1
PIRENPERONE	CC1=C(CCN2CCC(CC2)C(=O)c2ccc(F)cc2)C(=O)N2C=CC=CC2=N1	3-(2-{4-[(4-fluorophenyl)carbonyl]piperidin-1-yl}ethyl)-2-methyl-4H-pyrido[1,2-a]pyrimidin-4-one	23.1	4.2	91.6	1.1
Calcium channel blocker
NICARDIPINE	COC(=O)C1=C(C)NC(C)=C(C1c1cccc(c1)N(=O)=O)C(=O)OCCN(C)Cc1ccccc1	3-{2-[benzyl(methyl)amino]ethyl} 5-methyl 2,6-dimethyl-4-(3-nitrophenyl)-1,4-dihydropyridine-3,5-dicarboxylate	2	2.3	99.8	0.8	5850
AMLODIPINE BESYLATE	OS(=O)(=O)c1ccccc1.CCOC(=O)C1=C(COCCN)NC(C)=C(C1c1ccccc1Cl)C(=O)OC	3-ethyl 5-methyl 2-[(2-aminoethoxy)methyl]-4-(2-chlorophenyl)-6-methyl-1,4-dihydropyridine-3,5-dicarboxylate; benzenesulfonic acid	13.3	0.2	100	2.9	1100
BEPRIDIL	Cl.CC(C)COCC(CN(Cc1ccccc1)c1ccccc1)N1CCCC1	N-benzyl-N-[3-(2-methylpropoxy)-2-(pyrrolidin-1-yl)propyl]aniline hydrochloride	24.4	1.3	89.6	0.8
Adrenergic/dopaminergic agents
PRAZOSIN HYDROCHLORIDE	Cl.COc1cc2nc(nc(N)c2cc1OC)N1CCN(CC1)C(=O)c1ccco1	2-{4-[(furan-2-yl)carbonyl]piperazin-1-yl}-6,7-dimethoxyquinazolin-4-amine hydrochloride	1.8	0.2	70.7	5.2	8360
BROMOCRIPTINE MESYLATE	CS(O)(=O)=O.CC(C)CC1N2C(=O)C(NC(=O)C3CN(C)C4Cc5c(Br)[nH]c6cccc(C4=C3)c56)(OC2(O)C2CCCN2C1=O)C(C)C	10-bromo-N-[2-hydroxy-7-(2-methylpropyl)-5,8-dioxo-4-(propan-2-yl)-3-oxa-6,9-diazatricyclo[7.3.0.0^{2,6}]dodecan-4-yl]-6-methyl-6,11-diazatetracyclo[7.6.1.0^{2,7}.0^{12,16}]hexadeca-1(15),2,9,12(16),13-pentaene-4-carboxamide; methanesulfonic acid	2	0.4	92.1	4.1
RESERPINE	COC1C(CC2CN3CCc4c([nH]c5cc(OC)ccc45)C3CC2C1C(=O)OC)OC(=O)c1cc(OC)c(OC)c(OC)c1	methyl 6,18-dimethoxy-17-[(3,4,5-trimethoxyphenyl)carbonyloxy]-3,13-diazapentacyclo[11.8.0.0^{2,10}.0^{4,9}.0^{15,20}]henicosa-2(10),4(9),5,7-tetraene-19-carboxylate	4	0.6	100	3	5970
Other cardiovascular
BENAZEPRIL HYDROCHLORIDE	Cl.CCOC(=O)C(CCc1ccccc1)NC1CCc2ccccc2N(CC(O)=O)C1=O	2-{3-[(1-ethoxy-1-oxo-4-phenylbutan-2-yl)amino]-2-oxo-2,3,4,5-tetrahydro-1H-1-benzazepin-1-yl}acetic acid hydrochloride	1	0.2	66.8	8.6
AMIODARONE	Cl.CCCCc1oc2ccccc2c1C(=O)c1cc(I)c(OCCN(CC)CC)c(I)c1	(2-{4-[(2-butyl-1-benzofuran-3-yl)carbonyl]-2,6-diiodophenoxy}ethyl)diethylamine hydrochloride	5.6	0.2	86.7	3.1	1700
SIMVASTATIN	CCC(C)(C)C(=O)OC1CC(C)C=C2C=CC(C)C(CCC3CC(O)CC(=O)O3)C12	8-[2-(4-hydroxy-6-oxooxan-2-yl)ethyl]-3,7-dimethyl-1,2,3,7,8,8a-hexahydronaphthalen-1-yl 2,2-dimethylbutanoate	14.8	14.3	28.6	0.2	400
TRIAMTERENE	Nc1nc(N)c2nc(-c3ccccc3)c(N)nc2n1	6-phenylpteridine-2,4,7-triamine	17.3	3.5	72.7	6.4	18900
Nucleoside analog or inhibitor
FLOXURIDINE	OCC1OC(CC1O)N1C=C(F)C(=O)NC1=O	5-fluoro-1-[4-hydroxy-5-(hydroxymethyl)oxolan-2-yl]-1,2,3,4-tetrahydropyrimidine-2,4-dione	2.6	0.1	86.2	0.8
THIOGUANINE	NC1=NC(=S)c2[nH]cnc2N1	2-amino-6,7-dihydro-3H-purine-6-thione	14.8	4.83	98.3	1.7
MYCOPHENOLIC ACID	COc1c(C)c2COC(=O)c2c(O)c1CC=C(C)CCC(O)=O	6-(4-hydroxy-6-methoxy-7-methyl-3-oxo-1,3-dihydro-2-benzofuran-5-yl)-4-methylhex-4-enoic acid	12.2	3.57	97.2	1.2	320
NSAID
OXYPHENBUTAZONE	CCCCC1C(=O)N(N(C1=O)c1ccc(O)cc1)c1ccccc1	4-butyl-1-(4-hydroxyphenyl)-2-phenylpyrazolidine-3,5-dione	3.7	0.82	72.8	0.5	12000
Hormone modulator
CLOMIPHENE	CCN(CC)CCOc1ccc(cc1)C(=C(Cl)c1ccccc1)c1ccccc1	{2-[4-(2-chloro-1,2-diphenylethenyl)phenoxy]ethyl}diethylamine	12.9	3.11	100	4.5
TAMOXIFEN	CCC(=C(c1ccccc1)c1ccc(OCCN(C)C)cc1)c1ccccc1	{2-[4-(1,2-diphenylbut-1-en-1-yl)phenoxy]ethyl}dimethylamine	22.5	6.01	97	0.7
Antifungal
Miconazole	Clc1ccc(COC(Cn2ccnc2)c2ccc(Cl)cc2Cl)c(Cl)c1	1-[2-(2,4-dichlorophenyl)-2-[(2,4-dichlorophenyl)methoxy]ethyl]-1H-imidazole	0.4	0.1	100	2.5
BIFONAZOLE	c1cn(cn1)C(c1ccccc1)c1ccc(cc1)-c1ccccc1	1-[phenyl(4-phenylphenyl)methyl]-1H-imidazole	0.7	0.2	93.6	2.1
KETOCONAZOLE	CC(=O)N1CCN(CC1)c1ccc(OC[C@H]2CO[C@@](Cn3ccnc3)(O2)c2ccc(Cl)cc2Cl)cc1	1-[4-(4-{[(2R,4S)-2-(2,4-dichlorophenyl)-2-(1H-imidazol-1-ylmethyl)-1,3-dioxolan-4-yl]methoxy}phenyl)piperazin-1-yl]ethan-1-one	2.1	0.2	100	3.9	0.3
ECONAZOLE	Clc1ccc(COC(Cn2ccnc2)c2ccc(Cl)cc2Cl)cc1	1-{2-[(4-chlorophenyl)methoxy]-2-(2,4-dichlorophenyl)ethyl}-1H-imidazole	2.4	3.4	100	3.3
CLOTRIMAZOLE	Clc1ccccc1C(c1ccccc1)(c1ccccc1)n1ccnc1	1-[(2-chlorophenyl)diphenylmethyl]-1H-imidazole	10.2	1.7	100	11.7	1
AMPHOTERICIN B	CC1OC(OC2CC3OC(O)(CC(O)C3C(O)=O)CC(O)CC(O)C(O)CCC(O)CC(O)CC(=O)OC(C)C(C)C(O)C(C)C=CC=CC=CC=CC=CC=CC=C2)C(O)C(N)C1O	33-[(4-amino-3,5-dihydroxy-6-methyloxan-2-yl)oxy]-1,3,5,6,9,11,17,37-octahydroxy-15,16,18-trimethyl-13-oxo-14,39-dioxabicyclo[33.3.1]nonatriaconta-19,21,23,25,27,29,31-heptaene-36-carboxylic acid	20.6	6.82	89.7	2.3	0.04
Antiprotozoan/antibiotic
HYDROXYCHLOROQUINE SULFATE	OS(O)(=O)=O.CCN(CCO)CCCC(C)Nc1ccnc2cc(Cl)ccc12	2-({4-[(7-chloroquinolin-4-yl)amino]pentyl}(ethyl)amino)ethan-1-ol; sulfuric acid	0.1	0.2	100	3.1	4640
NITROMIDE	NC(=O)c1cc(cc(c1)N(=O)=O)N(=O)=O	3,5-dinitrobenzamide	1.9	0.5	97.2	0.3	4800
MEFLOQUINE	Cl.OC(C1CCCCN1)c1cc(nc2c(cccc12)C(F)(F)F)C(F)(F)F	[2,8-bis(trifluoromethyl)quinolin-4-yl](piperidin-2-yl)methanol hydrochloride	2.6	0.3	94.7	0.5	6100
PRIMAQUINE	OP(O)(O)=O.OP(O)(O)=O.COc1cc(NC(C)CCCN)c2ncccc2c1	N-(5-aminopentan-2-yl)-6-methoxyquinolin-8-amine; bis(phosphoric acid)	4.7	1.87	91.1	4.1	300
MINOCYCLINE	Cl.CN(C)C1C2CC3Cc4c(ccc(O)c4C(=O)C3=C(O)C2(O)C(=O)C(C(N)=O)=C1O)N(C)C	4,7-bis(dimethylamino)-3,10,12,12a-tetrahydroxy-1,11-dioxo-1,4,4a,5,5a,6,11,12a-octahydrotetracene-2-carboxamide hydrochloride	10.2	1	83.2	6.6	9800
ARTEMISININ	CC1CCC2C(C)C(=O)OC3OC4(C)CCC1C23OO4	1,5,9-trimethyl-11,14,15,16-tetraoxatetracyclo[10.3.1.0^{4,13}.0^{8,13}]hexadecan-10-one	17.5	0.7	77.6	0.5	5020
PENTAMIDINE ISETHIONATE	OCCS(O)(=O)=O.NC(=N)c1ccc(OCCCCCOc2ccc(cc2)C(N)=N)cc1	2-hydroxyethane-1-sulfonic acid; 4-{[5-(4-carbamimidoylphenoxy)pentyl]oxy}benzene-1-carboximidamide	17.6	2.17	94.8	4.2	180
PYRIMETHAMINE	CCc1nc(N)nc(N)c1-c1ccc(Cl)cc1	5-(4-chlorophenyl)-6-ethylpyrimidine-2,4-diamine	24.2	0.88	97.6	1.1	3820
Synthetic compounds: Miscellaneous
PROADIFEN	CCCC(C(=O)OCCN(CC)CC)(c1ccccc1)c1ccccc1	2-(diethylamino)ethyl 2,2-diphenylpentanoate	2.1	2.9	100	3.4
2,3,4'-TRIHYDROXY-4-METHOXYBENZOPHENONE			3.6	1.1	86.8	3.5
FIPRONIL	Nc1c(c(nn1-c1c(Cl)cc(cc1Cl)C(F)(F)F)C#N)S(=O)C(F)(F)F	5-amino-1-[2,6-dichloro-4-(trifluoromethyl)phenyl]-4-(trifluoromethane)sulfinyl-1H-pyrazole-3-carbonitrile	3.7	0.2	100	3.7
MEBEVERINE	CCN(CCCCOC(=O)c1ccc(OC)c(OC)c1)C(C)Cc1ccc(OC)cc1	4-{ethyl[1-(4-methoxyphenyl)propan-2-yl]amino}butyl 3,4-dimethoxybenzoate	4.1	1.3	92.3	2.5
TILORONE	CCN(CC)CCOc1ccc2-c3ccc(OCCN(CC)CC)cc3C(=O)c2c1	2,7-bis[2-(diethylamino)ethoxy]-9H-fluoren-9-one	7.8	5.2	89	0.6
methyl 7-deshydroxypyrogallin-4-carboxylate	COC(=O)C1=Cc2ccc(O)c(O)c2C(=O)C(O)=C1	methyl 3,4,6-trihydroxy-5-oxo-5H-benzo[7]annulene-8-carboxylate	18.2	3	92.2	6.5
BENFLUOREX	CC(Cc1cccc(c1)C(F)(F)F)NCCOC(=O)c1ccccc1	2-({1-[3-(trifluoromethyl)phenyl]propan-2-yl}amino)ethyl benzoate	21.6	2.82	96.6	1.2
HYDROQUINONE	Oc1ccc(O)cc1	benzene-1,4-diol	22.6	3	93.9	2.1
Natural Products: steroids and terpenoids
DANAZOL	C[C@]12CC[C@H]3[C@@H](CCC4=Cc5oncc5C[C@]34C)[C@@H]1CC[C@@]2(O)C#C	(1S,2R,13R,14S,17R,18S)-17-ethynyl-2,18-dimethyl-7-oxa-6-azapentacyclo[11.7.0.0^{2,10}.0^{4,8}.0^{14,18}]icosa-4(8),5,9-trien-17-ol	0.9	1.3	90.2	11	6970
HYDROXYPROGESTERONE CAPROATE	CCCCCC(=O)O[C@@]1(CC[C@H]2C3CCC4=CC(=O)CCC4(C)[C@H]3CCC12C)C(C)=O	(1S,11S,14R)-14-acetyl-2,15-dimethyl-5-oxotetracyclo[8.7.0.0^{2,7}.0^{11,15}]heptadec-6-en-14-yl hexanoate	1.8	0	100	4.5	10000
NILOTICIN	CC(CC(O)C1OC1(C)C)C1CCC2(C)C3=CCC4C(C)(C)C(=O)CCC4(C)C3CCC12C	14-[4-(3,3-dimethyloxiran-2-yl)-4-hydroxybutan-2-yl]-2,6,6,11,15-pentamethyltetracyclo[8.7.0.0^{2,7}.0^{11,15}]heptadec-9-en-5-one	2.2	0.5	100	6.3
ALLOPREGNANOLONE	CC(=O)[C@H]1CC[C@H]2[C@@H]3CC[C@H]4C[C@@H](O)CC[C@]4(C)[C@H]3CC[C@]12C	1-[(1S,2S,5S,7S,10R,11S,14S,15S)-5-hydroxy-2,15-dimethyltetracyclo[8.7.0.0^{2,7}.0^{11,15}]heptadecan-14-yl]ethan-1-one	3.7	0.7	100	10.2
CRYPTOTANSHINONE	CC1COC2=C1C(=O)C(=O)c1c2ccc2c1CCCC2(C)C	6,6,14-trimethyl-12-oxatetracyclo[8.7.0.0^{2,7}.0^{11,15}]heptadeca-1(10),2(7),8,11(15)-tetraene-16,17-dione	4.5	0.2	87	0.7
DIHYDROTANSHINONE I	CC1COC2=C1C(=O)C(=O)c1c2ccc2c(C)cccc12	6,14-dimethyl-12-oxatetracyclo[8.7.0.0^{2,7}.0^{11,15}]heptadeca-1(10),2(7),3,5,8,11(15)-hexaene-16,17-dione	4.8	0.1	77.1	1.9
ERGOSTEROL	CC(C)C(C)\C=C\C(C)C1CCC2C3=CC=C4CC(O)CCC4(C)C3CCC12C	14-[(3E)-5,6-dimethylhept-3-en-2-yl]-2,15-dimethyltetracyclo[8.7.0.0^{2,7}.0^{11,15}]heptadeca-7,9-dien-5-ol	6	1.3	99.6	4
LARIXOL	CC(O)(CCC1C(=C)CC(O)C2C(C)(C)CCCC12C)C=C	4-(3-hydroxy-3-methylpent-4-en-1-yl)-4a,8,8-trimethyl-3-methylidene-decahydronaphthalen-1-ol	6.4	0.8	74	0.1
5alpha-CHOLESTAN-3beta-OL-6-ONE	CC(C)CCCC(C)C1CCC2C3CC(=O)C4CC(O)CCC4(C)C3CCC12C	5-hydroxy-2,15-dimethyl-14-(6-methylheptan-2-yl)tetracyclo[8.7.0.0^{2,7}.0^{11,15}]heptadecan-8-one	7.8	1.3	100	4.9
TOMATIDINE	Cl.CC1C2C(CC3C4CCC5CC(O)CCC5(C)C4CCC23C)OC11CCC(C)CN1	5',7,9,13-tetramethyl-5-oxaspiro[pentacyclo[10.8.0.0^{2,9}.0^{4,8}.0^{13,18}]icosane-6,2'-piperidine]-16-ol hydrochloride	8.5	0.9	100	9.9
CHLORMADINONE ACETATE	CC(=O)OC1(CCC2C3C=C(Cl)C4=CC(=O)CCC4(C)C3CCC12C)C(C)=O	14-acetyl-8-chloro-2,15-dimethyl-5-oxotetracyclo[8.7.0.0^{2,7}.0^{11,15}]heptadeca-6,8-dien-14-yl acetate	9.7	0.4	97.4	2.9
BETULIN	CC(=C)C1CCC2(CO)CCC3(C)C(CCC4C5(C)CCC(O)C(C)(C)C5CCC34C)C12	5-(hydroxymethyl)-1,2,14,18,18-pentamethyl-8-(prop-1-en-2-yl)pentacyclo[11.8.0.0^{2,10}.0^{5,9}.0^{14,19}]henicosan-17-ol	9.7	4.4	100	0.6
ODORATONE	CC(C1OC(C)(C)C(O)C1O)C1CCC2(C)C3=CCC4C(C)(C)C(=O)CCC4(C)C3CCC12C	14-[1-(3,4-dihydroxy-5,5-dimethyloxolan-2-yl)ethyl]-2,6,6,11,15-pentamethyltetracyclo[8.7.0.0^{2,7}.0^{11,15}]heptadec-9-en-5-one	9.9	0.6	92.7	3.6
EUPHOL ACETATE	CC(CCC=C(C)C)C1CCC2(C)C3=C(CCC12C)C1(C)CCC(OC(C)=O)C(C)(C)C1CC3	2,6,6,11,15-pentamethyl-14-(6-methylhept-5-en-2-yl)tetracyclo[8.7.0.0^{2,7}.0^{11,15}]heptadec-1(10)-en-5-yl acetate	12	2.5	87.6	1.9
LANOSTEROL ACETATE	CC(CCC=C(C)C)C1CCC2(C)C3=C(CCC12C)C1(C)CCC(O)C(C)(C)C1CC3	2,6,6,11,15-pentamethyl-14-(6-methylhept-5-en-2-yl)tetracyclo[8.7.0.0^{2,7}.0^{11,15}]heptadec-1(10)-en-5-ol	12.4, 18.4	0.8, 4.2	100.0, 75.9	5.0, 7.1
TRIPTOPHENOLIDE	CC(C)c1ccc2c(CCC3C4=C(CCC23C)C(=O)OC4)c1O	6-hydroxy-1-methyl-5-(propan-2-yl)-13-oxatetracyclo[8.7.0.0^{2,7}.0^{11,15}]heptadeca-2,4,6,11(15)-tetraen-14-one	13.8	2.1	83.1	0.3
SOLIDAGENONE	CC1=CC(=O)C2C(C)(C)CCCC2(C)C1(O)CCc1ccoc1	4-[2-(furan-3-yl)ethyl]-4-hydroxy-3,4a,8,8-tetramethyl-1,4,4a,5,6,7,8,8a-octahydronaphthalen-1-one	15.1	5.5	75.8	2.2
EPIANDROSTERONE	CC12CCC3C(CCC4CC(O)CCC34C)C1CCC2=O	5-hydroxy-2,15-dimethyltetracyclo[8.7.0.0^{2,7}.0^{11,15}]heptadecan-14-one	18.8	5.3	100	6.6
ESTRADIOL PROPIONATE	CCC(=O)O[C@H]1CC[C@H]2[C@@H]3CCc4cc(O)ccc4[C@H]3CC[C@]12C	(1S,10R,11S,14S,15S)-5-hydroxy-15-methyltetracyclo[8.7.0.0^{2,7}.0^{11,15}]heptadeca-2,4,6-trien-14-yl propanoate	20.3	8.3	100	4.9
TOTAROL	CC(C)c1c(O)ccc2c1CCC1C(C)(C)CCCC21C	4b,8,8-trimethyl-1-(propan-2-yl)-4b,5,6,7,8,8a,9,10-octahydrophenanthren-2-ol	21.3	5.9	67.4	2.5
METHYL DEOXYCHOLATE	COC(=O)CCC(C)C1CCC2C3CCC4CC(O)CCC4(C)C3CC(O)C12C	methyl 4-{5,16-dihydroxy-2,15-dimethyltetracyclo[8.7.0.0^{2,7}.0^{11,15}]heptadecan-14-yl}pentanoate	22.9	1.3	100	9.5
CHOLIC ACID, METHYL ESTER	COC(=O)CCC(C)C1CCC2C3C(O)CC4CC(O)CCC4(C)C3CC(O)C12C	methyl 4-{5,9,16-trihydroxy-2,15-dimethyltetracyclo[8.7.0.0^{2,7}.0^{11,15}]heptadecan-14-yl}pentanoate	22.6	3.9	81	2.4
7-OXOCHOLESTEROL	CC(C)CCC[C@@H](C)[C@H]1CC[C@H]2[C@H]3[C@H](CC[C@]12C)[C@@]1(C)CC[C@H](O)CC1=CC3=O	(1S,2R,5S,10S,11S,14R,15R)-5-hydroxy-2,15-dimethyl-14-[(2R)-6-methylheptan-2-yl]tetracyclo[8.7.0.0^{2,7}.0^{11,15}]heptadec-7-en-9-one	23.4	1.8	68.5	9.9
ANDROSTA-1,4-DIEN-3,17-DIONE	CC12CCC3C(CCC4=CC(=O)C=CC34C)C1CCC2=O	2,15-dimethyltetracyclo[8.7.0.0^{2,7}.0^{11,15}]heptadeca-3,6-diene-5,14-dione	25.1	1.9	72.1	3.6
Natural products: flavinoids
7,8-DIHYDROXYFLAVONE	Oc1ccc2C(=O)C=C(Oc2c1O)c1ccccc1	7,8-dihydroxy-2-phenyl-4H-chromen-4-one	1.3	0.4	72.6	1
METHYL ROBUSTONE	COc1c2C=CC(C)(C)Oc2cc2OC=C(C(=O)c12)c1ccc2OCOc2c1	3-(2H-1,3-benzodioxol-5-yl)-5-methoxy-8,8-dimethyl-4H,8H-pyrano[3,2-g]chromen-4-one	2.5	0.2	68.2	0.4
3-HYDROXYFLAVONE	OC1=C(Oc2ccccc2C1=O)c1ccccc1	3-hydroxy-2-phenyl-4H-chromen-4-one	4.1	0.1	85.7	9.8
DIHYDROMUNDULETONE			4.4	0.1	81.3	7.6
MUNDULONE ACETATE			4.6	0.2	76	3.9
3-HYDROXY-3',4'-DIMETHOXYFLAVONE			5.2	0.1	99.2	1.3
IRIGENOL	Oc1cc2OC=C(C(=O)c2c(O)c1O)c1cc(O)c(O)c(O)c1	5,6,7-trihydroxy-3-(3,4,5-trihydroxyphenyl)-4H-chromen-4-one	5.7	0.7	73.7	17.1
GENISTEIN	Oc1ccc(cc1)C1=COc2cc(O)cc(O)c2C1=O	5,7-dihydroxy-3-(4-hydroxyphenyl)-4H-chromen-4-one	6.4	0.9	100	7.8
HIERACIN	Oc1cc(O)c2C(=O)C=C(Oc2c1)c1cc(O)c(O)c(O)c1	5,7-dihydroxy-2-(3,4,5-trihydroxyphenyl)-4H-chromen-4-one	6.5	0.4	100	0.1
SAPPANONE A TRIMETHYL ETHER			7.5	0.7	74.6	6.2
3,5-DIHYDROXYFLAVONE			12.3	4.7	99.6	10.4
DALBERGIONE	C=CC(c1ccccc1)C1=CC(=O)C=CC1=O	2-(1-phenylprop-2-en-1-yl)cyclohexa-2,5-diene-1,4-dione	12.4	1.3	97.5	1.9
APIGENIN	Oc1ccc(cc1)C1=CC(=O)c2c(O)cc(O)cc2O1	5,7-dihydroxy-2-(4-hydroxyphenyl)-4H-chromen-4-one	17.7	5.1	73.6	0.7
4'-METHOXYFLAVONE	COc1ccc(cc1)C1=CC(=O)c2ccccc2O1	2-(4-methoxyphenyl)-4H-chromen-4-one	18.7	2.8	100	7.6
DERRUBONE			22.8	2.1	75.4	2.6
ACACETIN	COc1ccc(cc1)C1=CC(=O)c2c(O)cc(O)cc2O1	5,7-dihydroxy-2-(4-methoxyphenyl)-4H-chromen-4-one	23.1	0.3	77.4	3.7
3',4'-DIMETHOXYFLAVONE	COc1ccc(cc1OC)C1=CC(=O)c2ccccc2O1	2-(3,4-dimethoxyphenyl)-4H-chromen-4-one	24	1	86.4	3.7
3-DESHYDROXYSAPPANOL TRIMETHYL ETHER			24.9	0.2	80.4	2.7
Natural products: uncategorized
3beta-ACETOXYDEOXYANGOLENSIC ACID, METHYL ESTER	COC(=O)CC1C(C)(C)C(CC2OC34CC(=O)OC(c5ccoc5)C3(C)CCC(C4=C)C12C)OC(C)=O	methyl 2-[5-(acetyloxy)-13-(furan-3-yl)-6,6,8,12-tetramethyl-17-methylidene-15-oxo-2,14-dioxatetracyclo[7.7.1.0^{1,12}.0^{3,8}]heptadecan-7-yl]acetate	1	0.5	84.1	3.4
SECURININE	O=C1OC23CC(C=CC2=C1)N1CCCCC31	14-oxa-7-azatetracyclo[6.6.1.0^{1,11}.0^{2,7}]pentadeca-9,11-dien-13-one	1.4	2	75	0.8
3beta,7beta-DIACETOXYDEOXODEACETOXYDEOXYDIHYDROGEDUNIN			2.5	0.3	72.2	0.1
MEPARTRICIN	CNc1ccc(cc1)C(=O)CC(O)CCC(C)C1OC(=O)CC(O)CC(=O)CC(O)CC(O)CC(O)CC(O)CC2(O)CC(O)C(C(CC(O[C@@H]3O[C@H](C)[C@@H](O)[C@H](N)[C@@H]3O)\C=C\C=C\C=C\C=C/C=C\C=C\C=C\C1C)O2)C(=O)OC	methyl (19E,21E,23Z,25Z,27E,29E,31E)-33-{[(2R,3S,4S,5S,6R)-4-amino-3,5-dihydroxy-6-methyloxan-2-yl]oxy}-1,3,5,7,9,13,37-heptahydroxy-17-{5-hydroxy-7-[4-(methylamino)phenyl]-7-oxoheptan-2-yl}-18-methyl-11,15-dioxo-16,39-dioxabicyclo[33.3.1]nonatriaconta-19,21,23,25,27,29,31-heptaene-36-carboxylate	2.6	0.1	97.3	1.2
MEBHYDROLIN NAPHTHALENESULFONATE	OS(=O)(=O)c1cccc2c(cccc12)S(O)(=O)=O.CN1CCc2c(C1)c1ccccc1n2Cc1ccccc1	5-benzyl-2-methyl-1H,2H,3H,4H,5H-pyrido[4,3-b]indole; naphthalene-1,5-disulfonic acid	3.3	1.1	100	2.4
ETHAVERINE	CCOc1ccc(Cc2nccc3cc(OCC)c(OCC)cc23)cc1OCC	1-[(3,4-diethoxyphenyl)methyl]-6,7-diethoxyisoquinoline	3.7	0.8	95.1	4.7
HAEMATOXYLIN	Oc1ccc2C3c4cc(O)c(O)cc4CC3(O)COc2c1O	8-oxatetracyclo[8.7.0.0^{2,7}.0^{12,17}]heptadeca-2,4,6,12,14,16-hexaene-5,6,10,14,15-pentol	3.7	0.9	100	1
CAMPTOTHECIN	CCC1(O)C(=O)OCC2=C1C=C1N(Cc3cc4ccccc4nc13)C2=O	19-ethyl-19-hydroxy-17-oxa-3,13-diazapentacyclo[11.8.0.0^{2,11}.0^{4,9}.0^{15,20}]henicosa-1(21),2,4(9),5,7,10,15(20)-heptaene-14,18-dione	3.9	0.3	94.3	5.2
BERBERINE	COc1ccc2cc3-c4cc5OCOc5cc4CC[n+]3cc2c1OC	16,17-dimethoxy-5,7-dioxa-13$l^{5}-azapentacyclo[11.8.0.0^{2,10}.0^{4,8}.0^{15,20}]henicosa-1(21),2,4(8),9,13,15,17,19-octaen-13-ylium	4.1	1.3	75.8	0
HARMOL	Cl.Cc1nccc2c3ccc(O)cc3[nH]c12	1-methyl-9H-pyrido[3,4-b]indol-7-ol hydrochloride	4.4	0.5	71.4	4.8
alpha-DIHYDROGEDUNOL			3.8	0.1	90.8	3.8
DEACETOXY-7-OXISOGEDUNIN	CC1(C)C=CC(=O)C2(C)C1CC(=O)C1(C)C2CCC2(C)C(OC(=O)C3OC123)c1ccoc1	7-(furan-3-yl)-1,8,12,16,16-pentamethyl-3,6-dioxapentacyclo[9.8.0.0^{2,4}.0^{2,8}.0^{12,17}]nonadec-14-ene-5,13,19-trione	3.9	1.1	100	0.6
DEACETYLGEDUNIN	CC1(C)C2CC(O)C3(C)C(CCC4(C)C(OC(=O)C5OC345)c3ccoc3)C2(C)C=CC1=O	7-(furan-3-yl)-19-hydroxy-1,8,12,16,16-pentamethyl-3,6-dioxapentacyclo[9.8.0.0^{2,4}.0^{2,8}.0^{12,17}]nonadec-13-ene-5,15-dione	4.4	0.1	76	3.1
EPOXYGEDUNIN	CC(=O)OC1CC2C(C)(C)C(=O)C3OC3C2(C)C2CCC3(C)C(OC(=O)C4OC34C12C)c1ccoc1	7-(furan-3-yl)-1,8,12,17,17-pentamethyl-5,16-dioxo-3,6,14-trioxahexacyclo[9.9.0.0^{2,4}.0^{2,8}.0^{12,18}.0^{13,15}]icosan-20-yl acetate	4.4	0.3	73.4	4.1
PHENACYLAMINE	Cl.NCC(=O)c1ccccc1	2-amino-1-phenylethan-1-one hydrochloride	4.8	0.2	85.5	3.3
DEACETOXY-7-OXOGEDUNIN	CC1(C)C2CC(=O)C3(C)C(CCC4(C)C(OC(=O)C5OC345)c3ccoc3)C2(C)C=CC1=O	7-(furan-3-yl)-1,8,12,16,16-pentamethyl-3,6-dioxapentacyclo[9.8.0.0^{2,4}.0^{2,8}.0^{12,17}]nonadec-13-ene-5,15,19-trione	4.9	0.4	75.8	1.8
ELAIDYLPHOSPHOCHOLINE	CCCCCCCC\C=C\CCCCCCCCOP([O-])(=O)OCC[N+](C)(C)C	(9E)-octadec-9-en-1-yl [2-(trimethylazaniumyl)ethyl] phosphate	5	0.8	93.7	2.2
DALBERGIONE, 4-METHOXY-4'-HYDROXY-	COC1=CC(=O)C(=CC1=O)C(C=C)c1ccc(O)cc1	2-[1-(4-hydroxyphenyl)prop-2-en-1-yl]-5-methoxycyclohexa-2,5-diene-1,4-dione	5.1	1.1	94.8	2.9
7-OXOCALLITRISIC ACID, METHYL ESTER	COC(=O)C1(C)CCCC2(C)C1CC(=O)c1cc(ccc21)C(C)C	methyl 1,4a-dimethyl-9-oxo-7-(propan-2-yl)-1,2,3,4,4a,9,10,10a-octahydrophenanthrene-1-carboxylate	5.1	0.8	91.8	6.7
DIHYDROGEDUNIN	CC(=O)OC1CC2C(C)(CCC(=O)C2(C)C)C2CCC3(C)C(OC(=O)C4OC34C12C)c1ccoc1	7-(furan-3-yl)-1,8,12,16,16-pentamethyl-5,15-dioxo-3,6-dioxapentacyclo[9.8.0.0^{2,4}.0^{2,8}.0^{12,17}]nonadecan-19-yl acetate	5.8	0.3	81.4	3.6
PHORBOL MYRISTATE ACETATE	CCCCCCCCCCCCCC(=O)O[C@@H]1[C@@H](C)[C@]2(O)[C@@H]3C=C(C)C(=O)[C@@]3(O)CC(CO)=C[C@H]2[C@@H]2C(C)(C)[C@]12OC(C)=O	(1S,2S,6R,10S,11R,13S,14R,15R)-13-(acetyloxy)-1,6-dihydroxy-8-(hydroxymethyl)-4,12,12,15-tetramethyl-5-oxotetracyclo[8.5.0.0^{2,6}.0^{11,13}]pentadeca-3,8-dien-14-yl tetradecanoate	5.6	0.8	89.2	1.7
RHETSININE	CNc1ccccc1C(=O)N1CCc2c([nH]c3ccccc23)C1=O	2-{[2-(methylamino)phenyl]carbonyl}-1H,2H,3H,4H,9H-pyrido[3,4-b]indol-1-one	5.9	1.4	75.7	2.9
3beta-ACETOXYDEOXODIHYDROGEDUNIN	CC(=O)OC1CCC2(C)C(CC(OC(C)=O)C3(C)C2CCC2(C)C(OC(=O)C4OC324)c2ccoc2)C1(C)C	15-(acetyloxy)-7-(furan-3-yl)-1,8,12,16,16-pentamethyl-5-oxo-3,6-dioxapentacyclo[9.8.0.0^{2,4}.0^{2,8}.0^{12,17}]nonadecan-19-yl acetate	7	0	96.7	1.1
XYLOCARPUS A	COC(=O)CC1C2(C)C3CCC4(C)C(OC(=O)C=C4C33OC2(O)C(C3OC(C)=O)C(OC(C)=O)C1(C)C)c1ccoc1	methyl 2-[14,18-bis(acetyloxy)-6-(furan-3-yl)-16-hydroxy-7,11,13,13-tetramethyl-4-oxo-5,17-dioxapentacyclo[13.2.1.0^{1,10}.0^{2,7}.0^{11,16}]octadec-2-en-12-yl]acetate	7.2	0	89.7	0.9
DIMETHYL CAPERATATE			7.3	0.5	70.1	0.6
HARMINE	COc1ccc2c(c1)[nH]c1c(C)nccc21	7-methoxy-1-methyl-9H-pyrido[3,4-b]indole	7.5	1.8	87.2	4.7
1,2alpha-EPOXYDEACETOXYDIHYDROGEDUNIN	CC1(C)C2CC(O)C3(C)C(CCC4(C)C(OC(=O)C5OC345)c3ccoc3)C2(C)C2OC2C1=O	7-(furan-3-yl)-20-hydroxy-1,8,12,17,17-pentamethyl-3,6,14-trioxahexacyclo[9.9.0.0^{2,4}.0^{2,8}.0^{12,18}.0^{13,15}]icosane-5,16-dione	7.8	0.6	77.3	5.6
FRAXETIN	COc1cc2C=CC(=O)Oc2c(O)c1O	7,8-dihydroxy-6-methoxy-2H-chromen-2-one	8.1	3.5	100	3.5
PAPAVERINE	Cl.COc1ccc(Cc2nccc3cc(OC)c(OC)cc23)cc1OC	1-[(3,4-dimethoxyphenyl)methyl]-6,7-dimethoxyisoquinoline hydrochloride	8.4	1.7	93.1	0.4
3-DEOXO-3beta-ACETOXYDEOXYDIHYDROGEDUNIN	CC(=O)OC1CCC2(C)C(CC(OC(C)=O)C3(C)C2CCC2(C)C(OC(=O)C=C32)c2ccoc2)C1(C)C	18-(acetyloxy)-6-(furan-3-yl)-1,7,11,15,15-pentamethyl-4-oxo-5-oxatetracyclo[8.8.0.0^{2,7}.0^{11,16}]octadec-2-en-14-yl acetate	7.8, 9.5	0.3, 0.2	100.0, 100.0	3.9, 5.8
PALMATINE	[ClH-].COc1cc2CC[n+]3cc4c(OC)c(OC)ccc4cc3-c2cc1OC	3,4,10,11-tetramethoxy-7,8-dihydro-6000000$l^{5}-azatetraphen-6-ylium $l^{3}-chloridyl	8.1, 11.5	3.8, 0.5	100.0, 95.9	6.2, 0.0
DEOXYSAPPANONE B TRIMETHYL ETHER	COc1ccc2C(=O)C(Cc3ccc(OC)c(OC)c3)COc2c1	3-[(3,4-dimethoxyphenyl)methyl]-7-methoxy-3,4-dihydro-2H-1-benzopyran-4-one	8.3	2.1	84.5	0.2
2,3-DIHYDROXY-4-METHOXY-4'-ETHOXYBENZOPHENONE			9.1	0.1	95.8	0.9
PHYSCION	COc1cc(O)c2C(=O)c3c(O)cc(C)cc3C(=O)c2c1	1,8-dihydroxy-3-methoxy-6-methyl-9,10-dihydroanthracene-9,10-dione	9.2	0	96.8	2.6
2',beta-DIHYDROXYCHALCONE	O\C(=C\C(=O)c1ccccc1O)c1ccccc1	(2E)-3-hydroxy-1-(2-hydroxyphenyl)-3-phenylprop-2-en-1-one	10	1	100	1.7
DIHYDROSAMIDIN	CC(C)CC(=O)OC1C(OC(C)=O)c2c(OC1(C)C)ccc1C=CC(=O)Oc21	14-(acetyloxy)-12,12-dimethyl-4-oxo-3,11-dioxatricyclo[8.4.0.0^{2,7}]tetradeca-1(10),2(7),5,8-tetraen-13-yl 3-methylbutanoate	10.9	0.8	81.2	6.2
3-OXOURSAN (28-13)OLIDE			11.1	1.6	100	2
COSMOSIIN HEXAACETATE			12.9	1.9	100	3.9
CHRYSANTHELLIN A			12.9	6.7	100	7.1
DEOXYANDIROBIN LACTONE			13.2	1.1	82.7	3.1
BOVINOCIDIN	OC(=O)CCN(=O)=O	3-nitropropanoic acid	14.1	8.6	88.6	1.5
EPI(13)TORULOSOL	CC(O)(CCC1C(=C)CCC2C(C)(CO)CCCC12C)C=C	5-[5-(hydroxymethyl)-5,8a-dimethyl-2-methylidene-decahydronaphthalen-1-yl]-3-methylpent-1-en-3-ol	14.5	2.8	86.1	8.1
OLEANDOMYCIN PHOSPHATE	OP(O)(O)=O.COC1CC(OC2C(C)C(OC3OC(C)CC(C3O)N(C)C)C(C)CC3(CO3)C(=O)C(C)C(O)C(C)C(C)OC(=O)C2C)OC(C)C1O	14-{[4-(dimethylamino)-3-hydroxy-6-methyloxan-2-yl]oxy}-6-hydroxy-12-[(5-hydroxy-4-methoxy-6-methyloxan-2-yl)oxy]-5,7,8,11,13,15-hexamethyl-1,9-dioxaspiro[2.13]hexadecane-4,10-dione; phosphoric acid	15.7	1.04	100	1.8
HAEMATOXYLIN PENTAACETATE	CC(=O)OC1Oc2c(ccc(OC(C)=O)c2OC(C)=O)C2C1Cc1cc(OC(C)=O)c(OC(C)=O)cc21	5,6,14,15-tetrakis(acetyloxy)-8-oxatetracyclo[8.7.0.0^{2,7}.0^{12,17}]heptadeca-2(7),3,5,12,14,16-hexaen-9-yl acetate	17.3	0.6	100	1
GOSSYPIN	OCC1OC(Oc2c(O)cc(O)c3c2oc(-c2ccc(O)c(O)c2)c(O)c3=O)C(O)C(O)C1O	2-(3,4-dihydroxyphenyl)-3,5,7-trihydroxy-8-{[3,4,5-trihydroxy-6-(hydroxymethyl)oxan-2-yl]oxy}-4H-chromen-4-one	17.7	13.1	100	1.5
2-METHYL GRAMINE			20.8	2.4	86.9	1.4
beta-DIHYDROGEDUNOL	CC(=O)OC1CC2C(C)(C)C(O)CCC2(C)C2CCC3(C)C(OC(=O)C4OC34C12C)c1ccoc1	7-(furan-3-yl)-15-hydroxy-1,8,12,16,16-pentamethyl-5-oxo-3,6-dioxapentacyclo[9.8.0.0^{2,4}.0^{2,8}.0^{12,17}]nonadecan-19-yl acetate	21.8	1.1	76.3	6.9
3,16-DIDEOXYMEXICANOLIDE-3beta-DIOL			22.1	3.6	99.8	4.6
DIHYDRODEOXYGEDUNIN			23.4	2.3	83.8	3.9
